# Supplementary material
Source: PubMed Central journal article supplement (PMC3489918)
Supplement: NIHMS409402-supplement-ESI.pdf [file NIHMS409402-supplement-ESI.pdf]

Supporting Information for  
**Nickel-Iron Dithiolates Related to the Deactivated [NiFe]-Hydrogenases**

David Schilter and Thomas B. Rauchfuss\*

Department of Chemistry, University of Illinois at Urbana-Champaign, 600 S. Goodwin  
Ave.  
Urbana, IL 61801

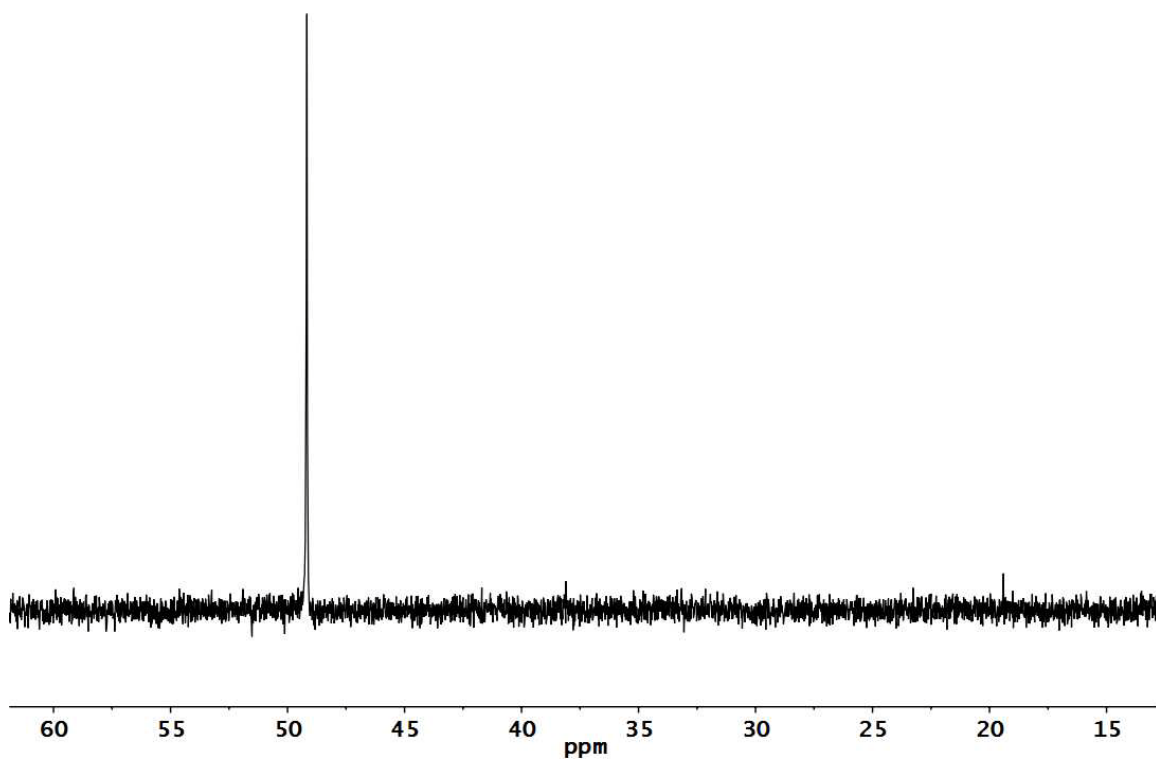

**Figure 1:**  $^{31}\text{P}\{^1\text{H}\}$  NMR spectrum ( $\text{CD}_2\text{Cl}_2$ , 202 MHz) of  $[\text{1I}]\text{BF}_4$ .

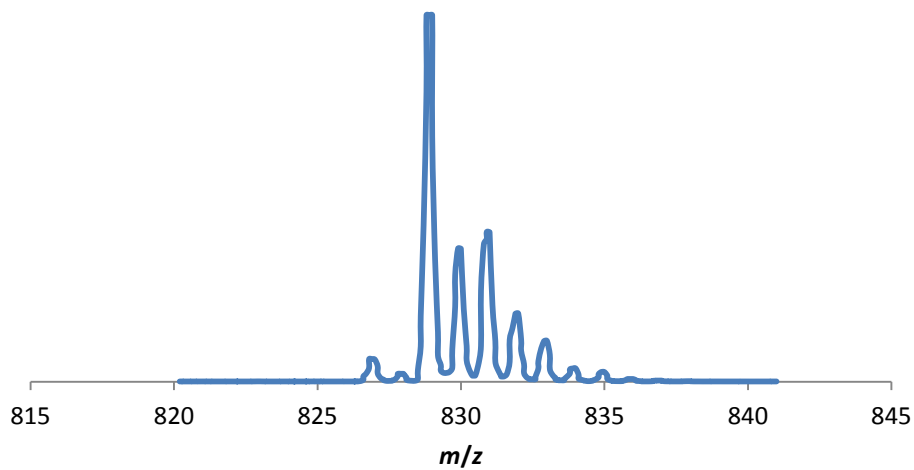

**Figure 2:** Positive ion ESI mass spectrum of  $[11]BF_4$ .

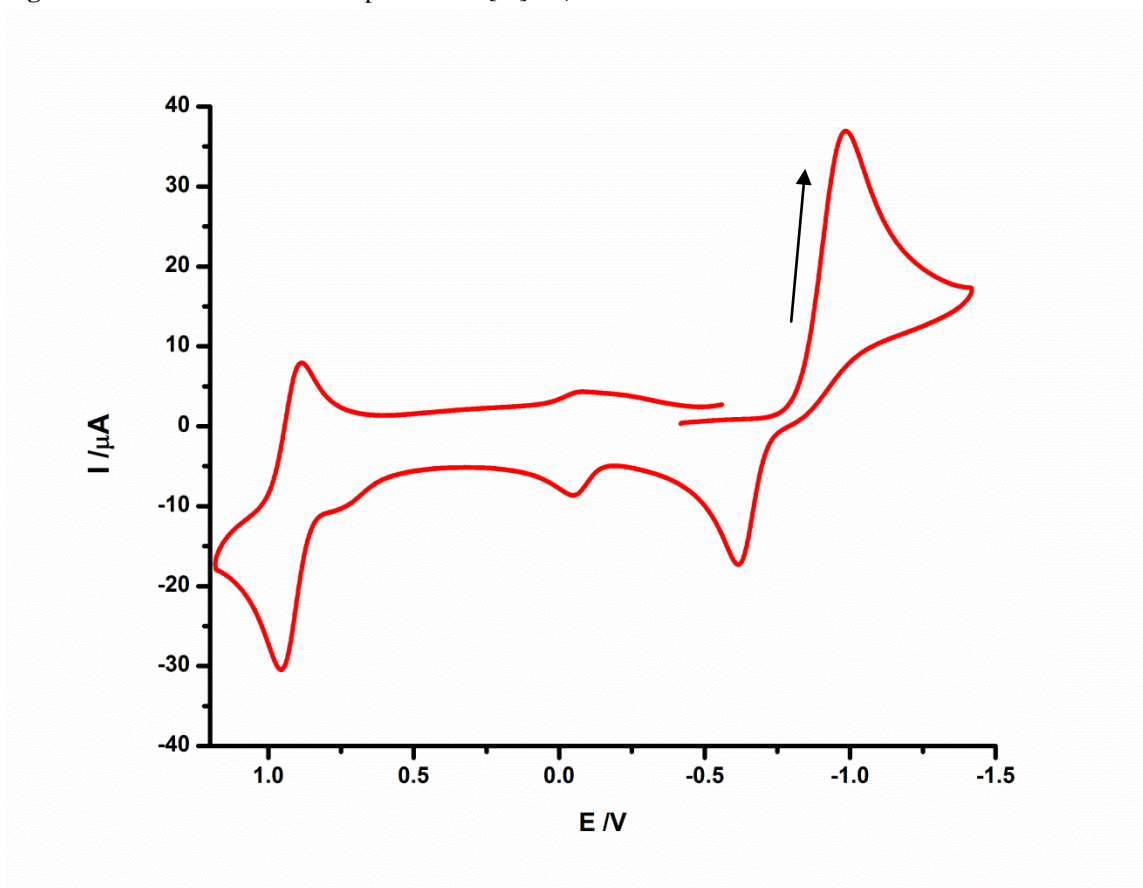

**Figure 3:** Cyclic voltammogram of  $[11]BF_4$ .

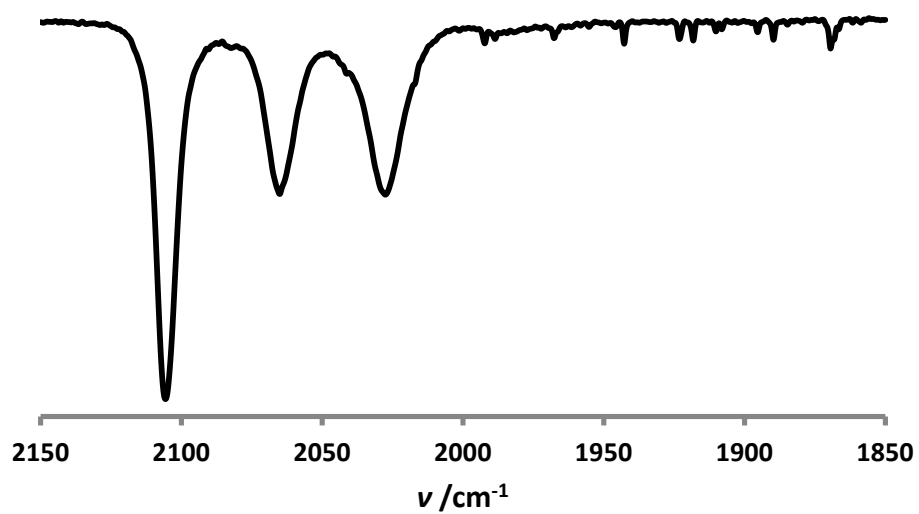

**Figure 4:** FT-IR spectrum ( $\nu_{\text{CO}}$  region,  $\text{CH}_2\text{Cl}_2$ ) of  $[\mathbf{1Br}]\text{BF}_4$ .

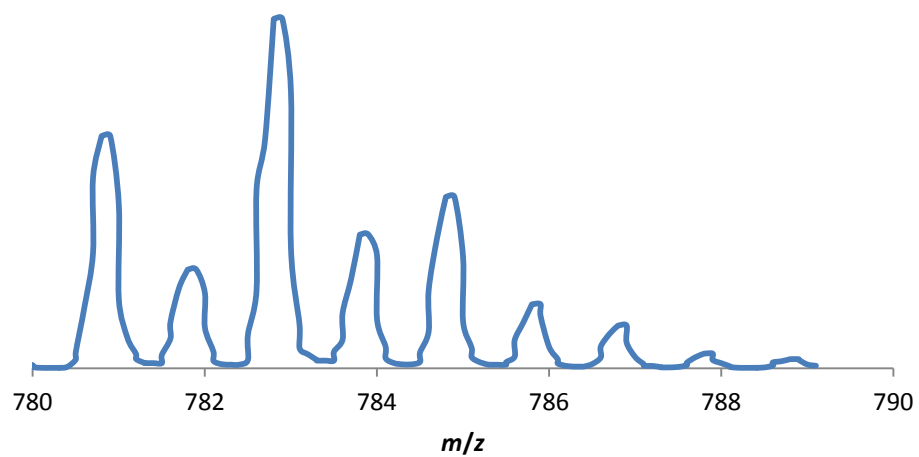

**Figure 5:** Positive ion ESI mass spectrum of  $[\mathbf{1Br}]\text{BF}_4$ .

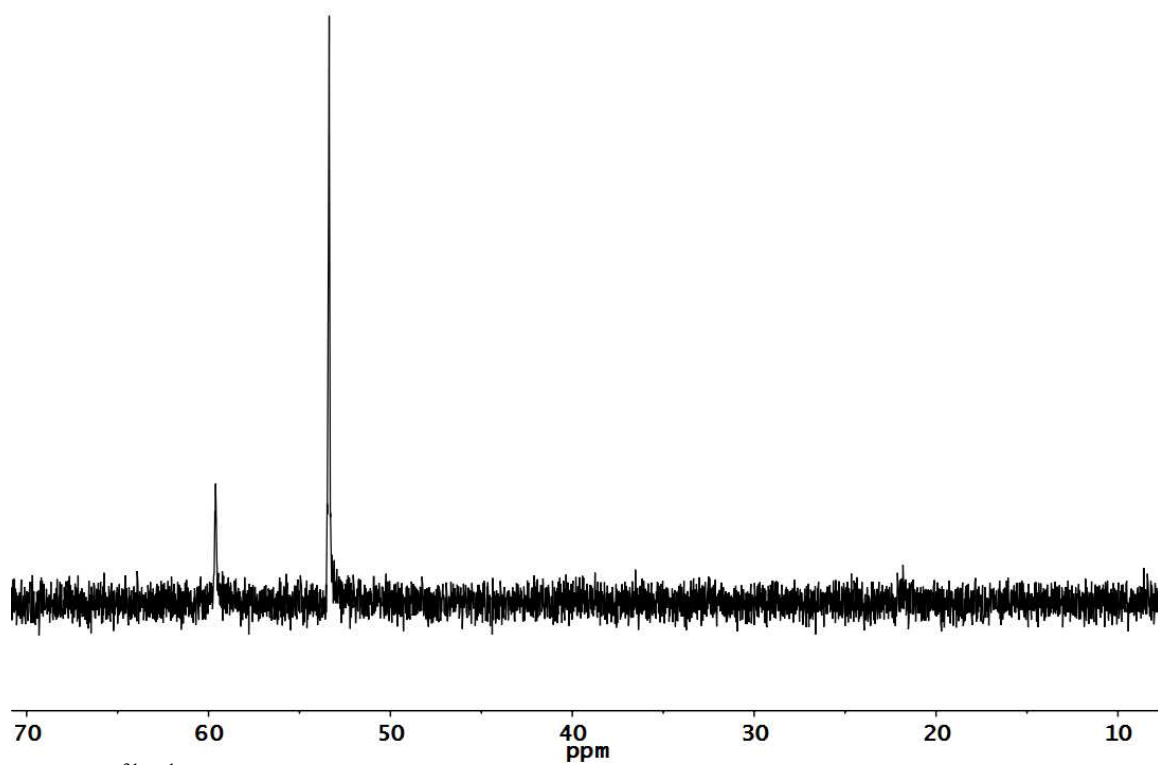

Figure 6:  $^{31}\text{P}\{^1\text{H}\}$  NMR spectrum ( $\text{CD}_2\text{Cl}_2$ , 202 MHz) of  $[\mathbf{1Br}]\text{BF}_4$ .

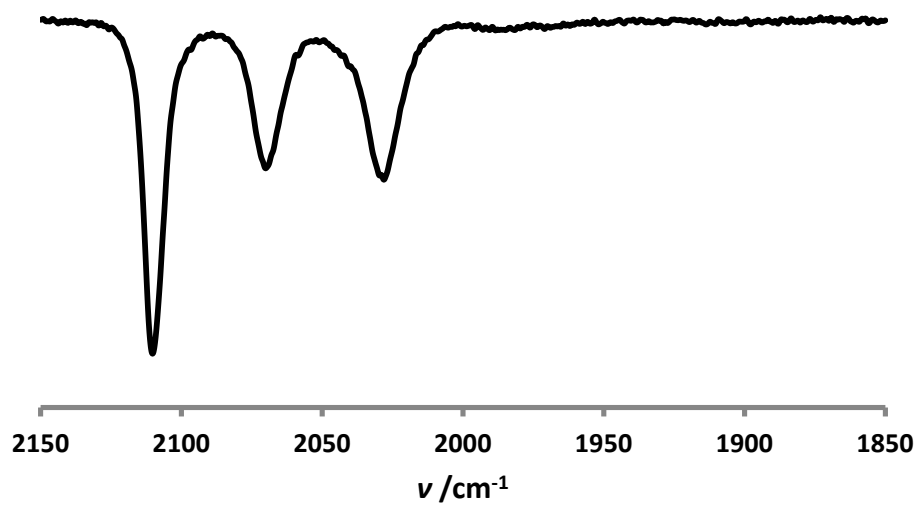

Figure 7: FT-IR spectrum ( $\nu_{\text{CO}}$  region,  $\text{CH}_2\text{Cl}_2$ ) of  $[\mathbf{1Cl}]\text{BF}_4$ .

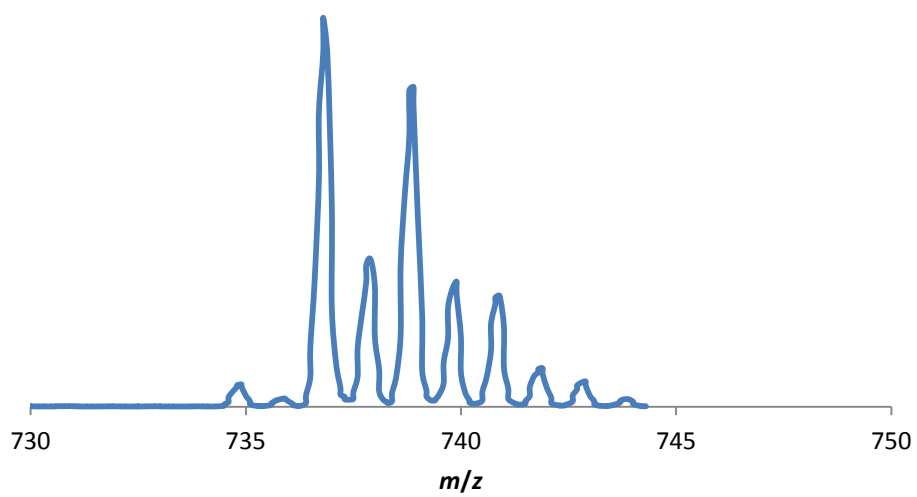

**Figure 8:** Positive ion ESI mass spectrum of  $[1\text{Cl}]\text{BF}_4$ .

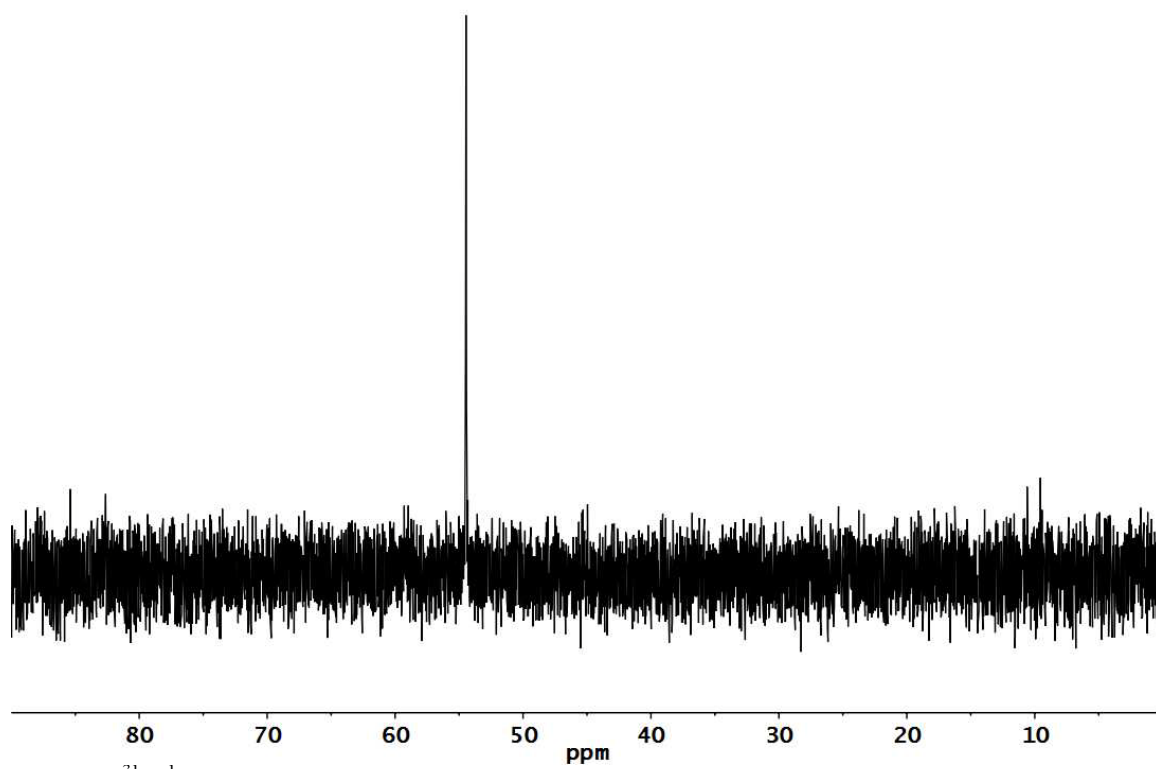

**Figure 9:**  $^{31}\text{P}\{^1\text{H}\}$  NMR spectrum ( $\text{CD}_2\text{Cl}_2$ , 202 MHz) of  $[1\text{Cl}]\text{BF}_4$ .

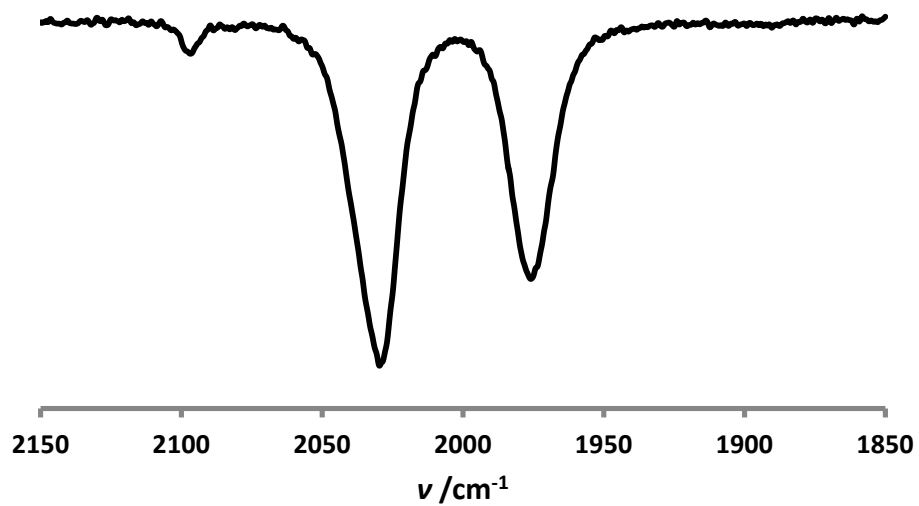

**Figure 10:** FT-IR spectrum ( $\nu_{\text{CO}}$  region,  $\text{CH}_2\text{Cl}_2$ ) of  $[\mathbf{1aI}]\text{BF}_4$ .

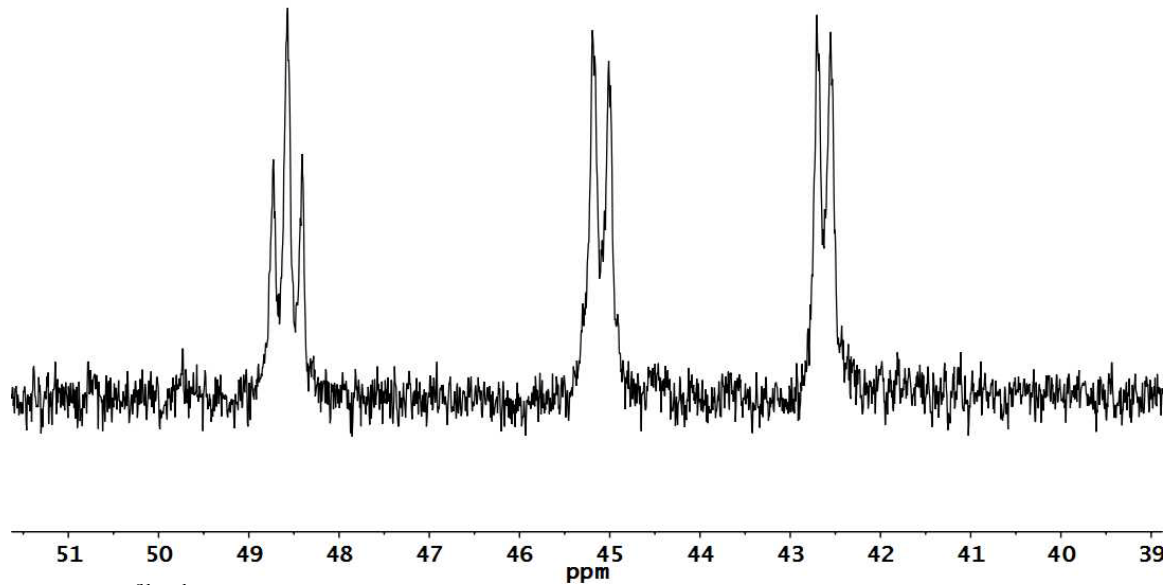

**Figure 11:**  $^{31}\text{P}\{^1\text{H}\}$  NMR spectrum ( $\text{CD}_2\text{Cl}_2$ , 202 MHz) of  $[\mathbf{1aI}]\text{BF}_4$ .

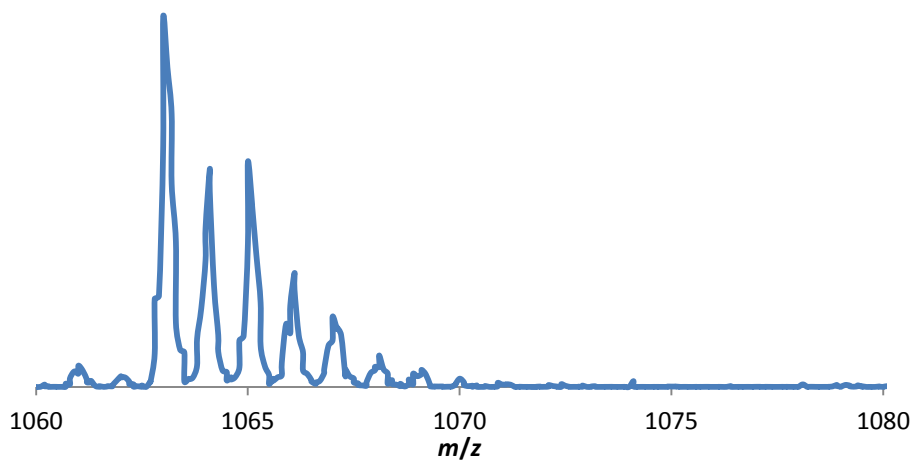

**Figure 12:** Positive ion ESI mass spectrum of  $[1aI]BF_4$ .

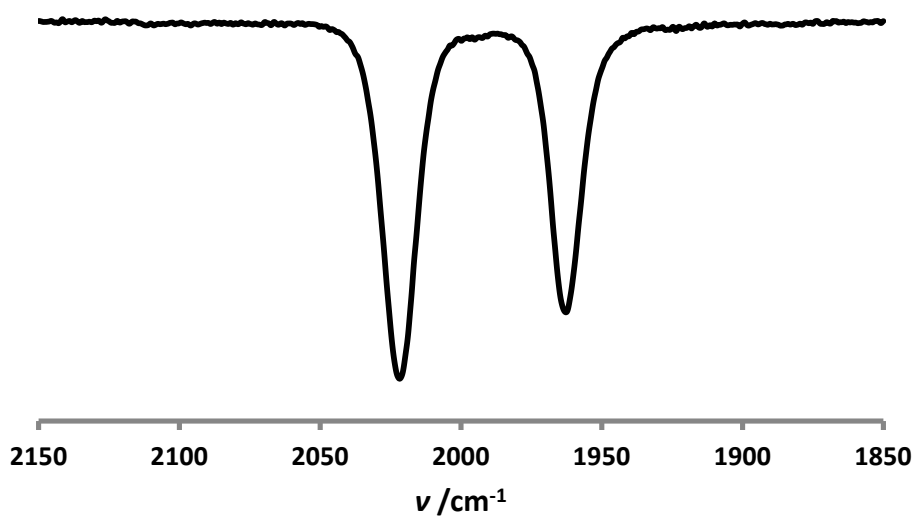

**Figure 13:** FT-IR spectrum ( $\nu_{CO}$  region,  $CH_2Cl_2$ ) of  $[1bI]BF_4$ .

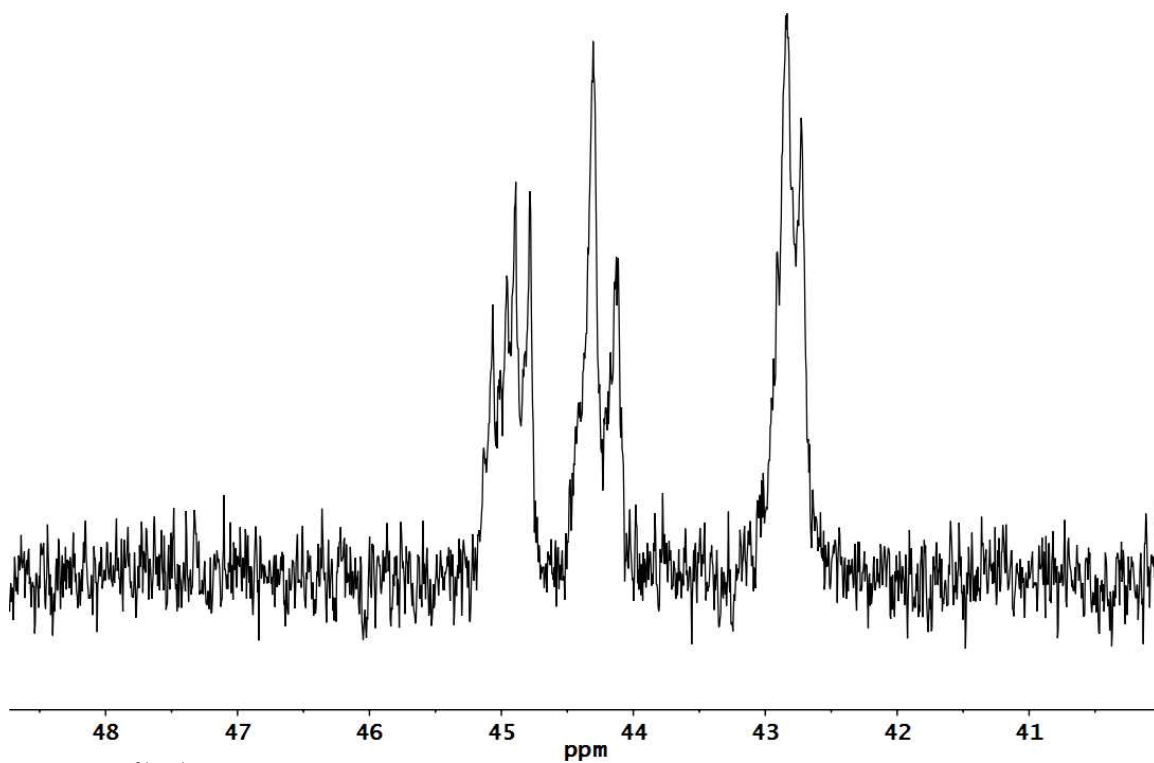

**Figure 14:**  $^{31}\text{P}\{^1\text{H}\}$  NMR spectrum ( $\text{CD}_2\text{Cl}_2$ , 202 MHz) of  $[\mathbf{1bI}]\text{BF}_4$ .

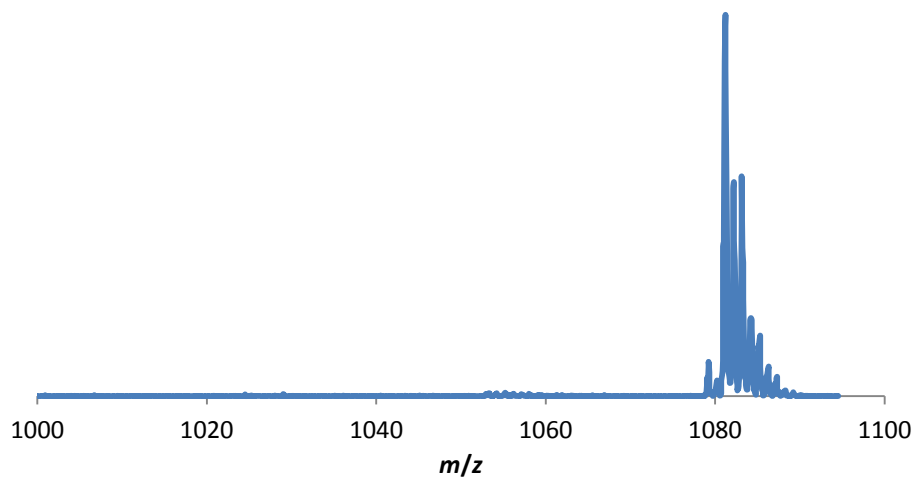

**Figure 15:** Positive ion ESI mass spectrum of  $[\mathbf{1bI}]\text{BF}_4$ .



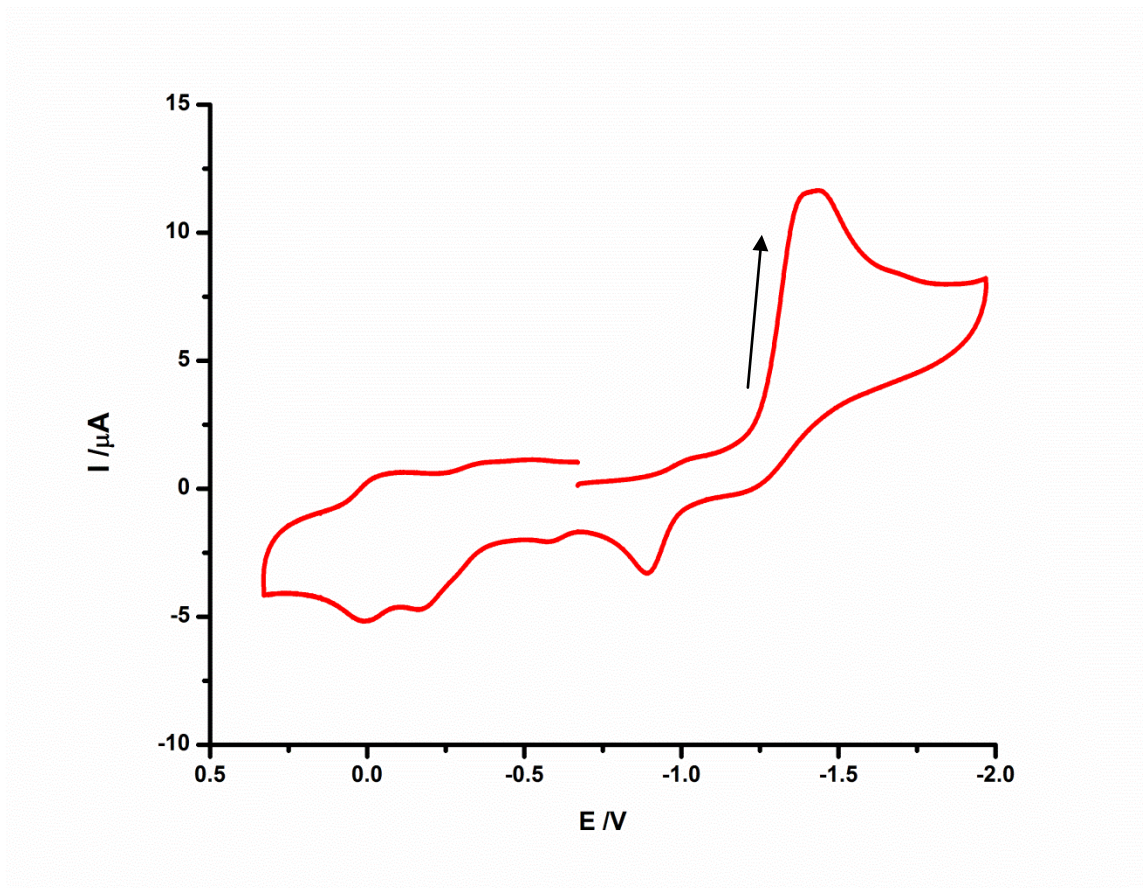

**Figure 16:** Cyclic voltammogram of [1bI]BF<sub>4</sub>.

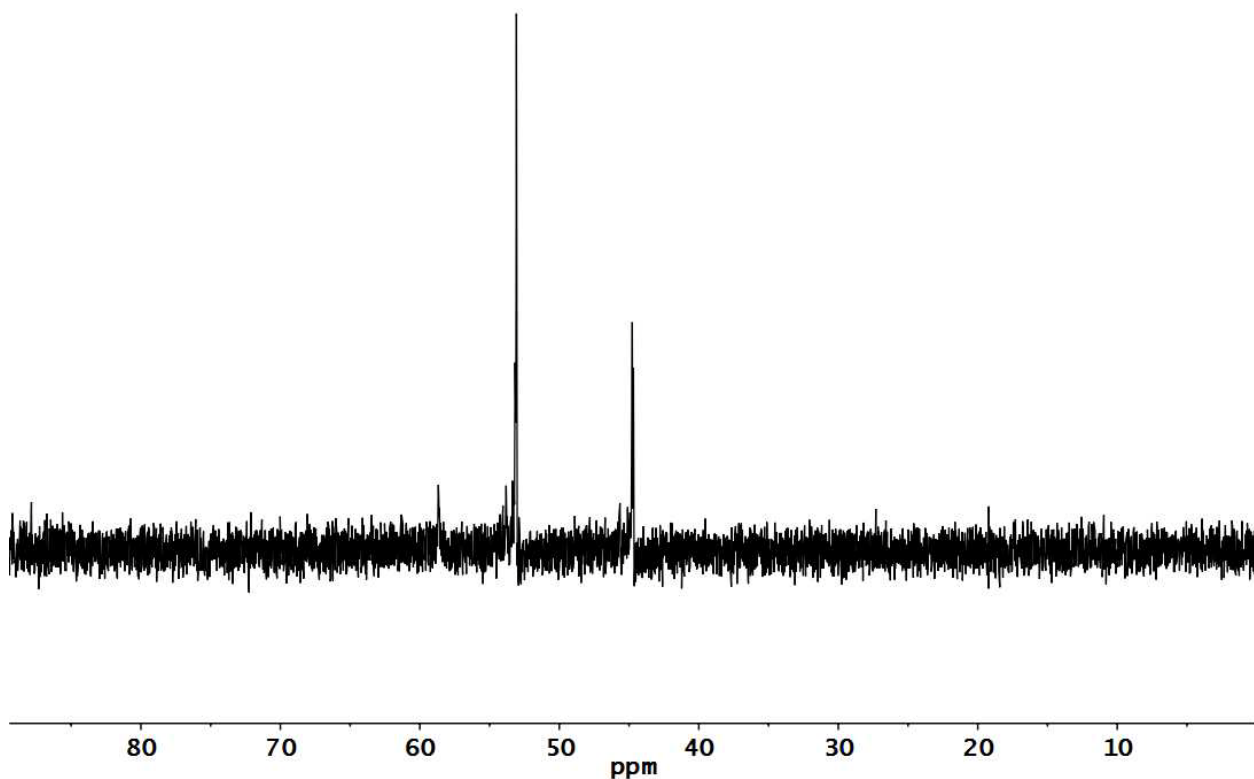

Figure 17:  $^{31}\text{P}\{^1\text{H}\}$  NMR spectrum ( $\text{CD}_2\text{Cl}_2$ , 202 MHz) of  $[\mathbf{1aCl}]\text{BF}_4$ .

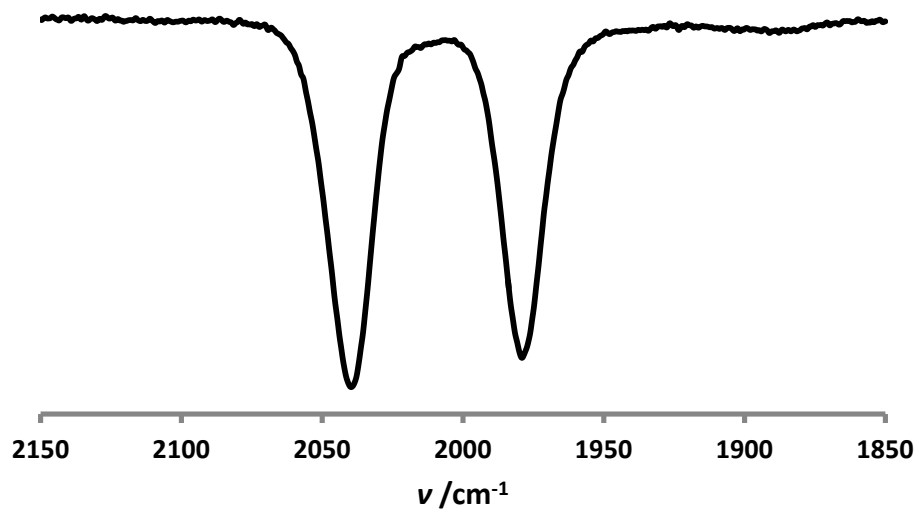

Figure 18: FT-IR spectrum ( $\nu_{\text{CO}}$  region,  $\text{CH}_2\text{Cl}_2$ ) of  $[\mathbf{1aCl}]\text{BF}_4$ .

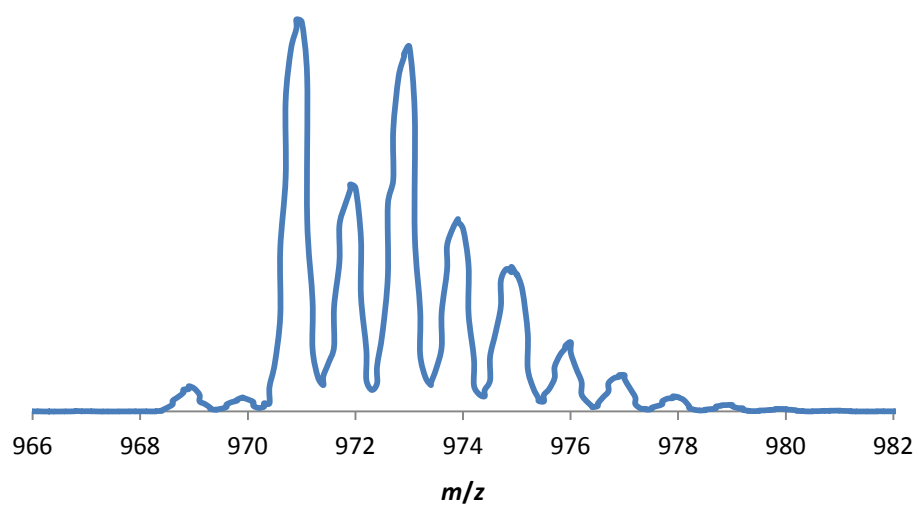

**Figure 19:** Positive ion ESI mass spectrum of  $[1aCl]BF_4$ .

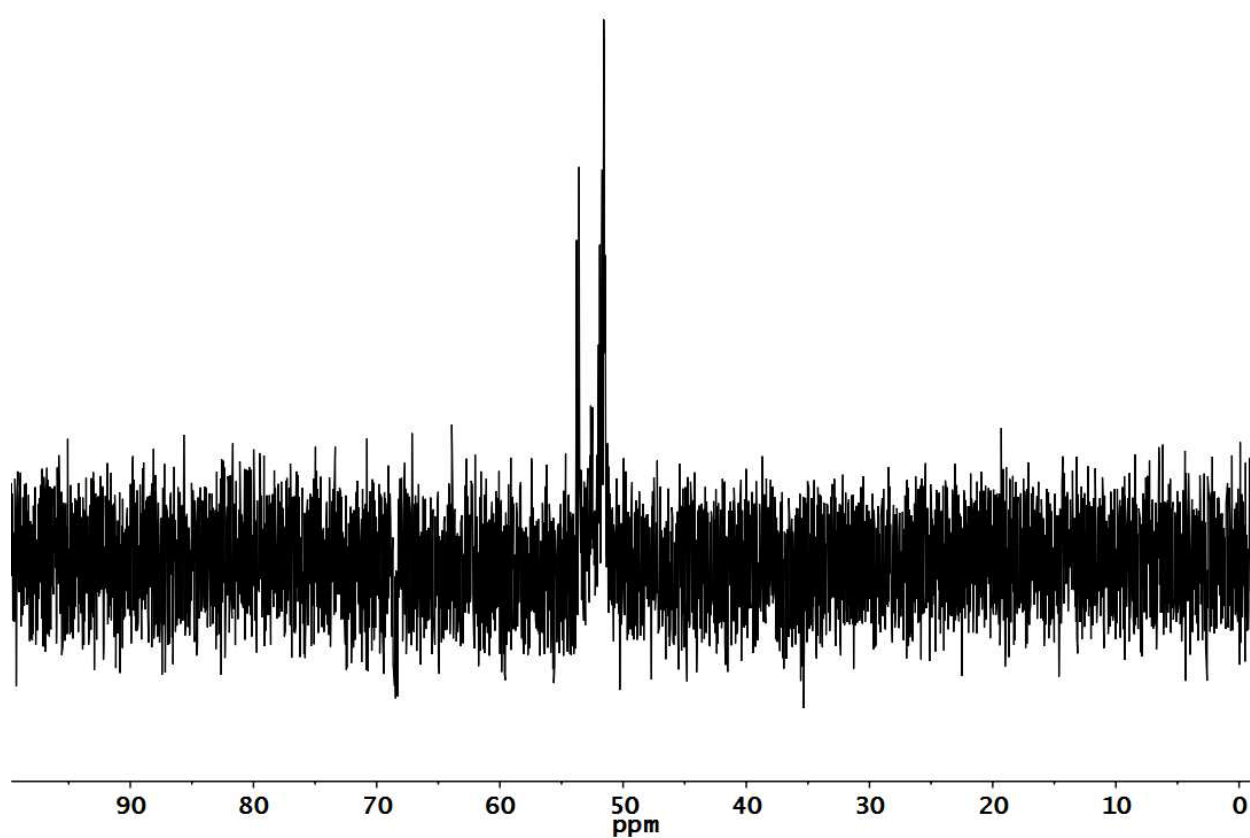

**Figure 20:**  $^{31}P\{^1H\}$  NMR spectrum ( $CD_2Cl_2$ , 202 MHz) of  $[1bCl]BF_4$ .

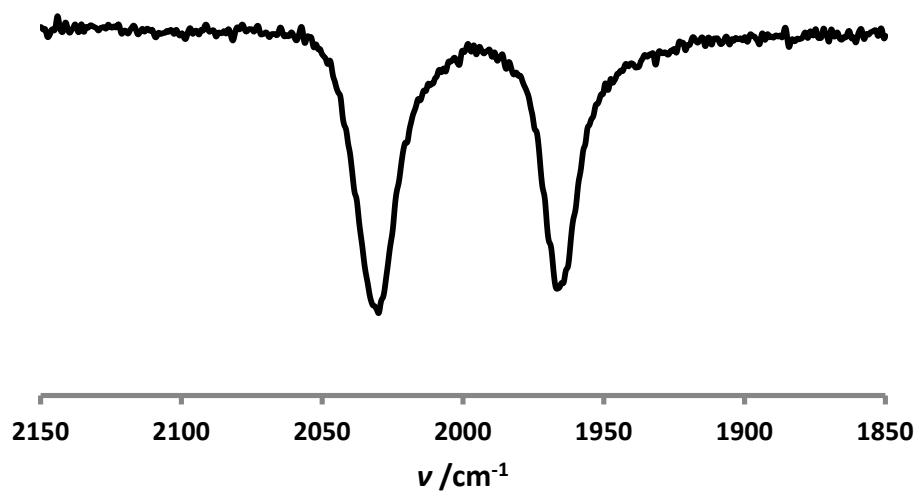

**Figure 21:** FT-IR spectrum ( $\nu_{\text{CO}}$  region,  $\text{CH}_2\text{Cl}_2$ ) of  $[\mathbf{1bCl}]\text{BF}_4$ .

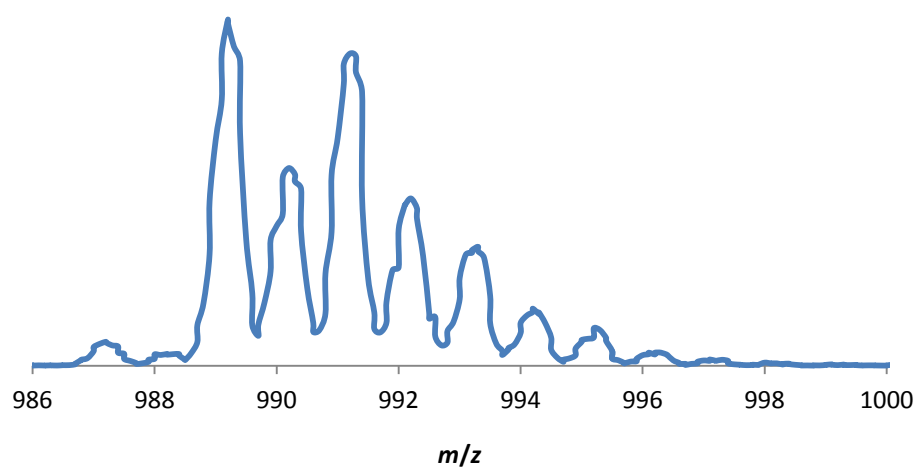

**Figure 22:** Positive ion ESI mass spectrum of  $[\mathbf{1bCl}]\text{BF}_4$ .

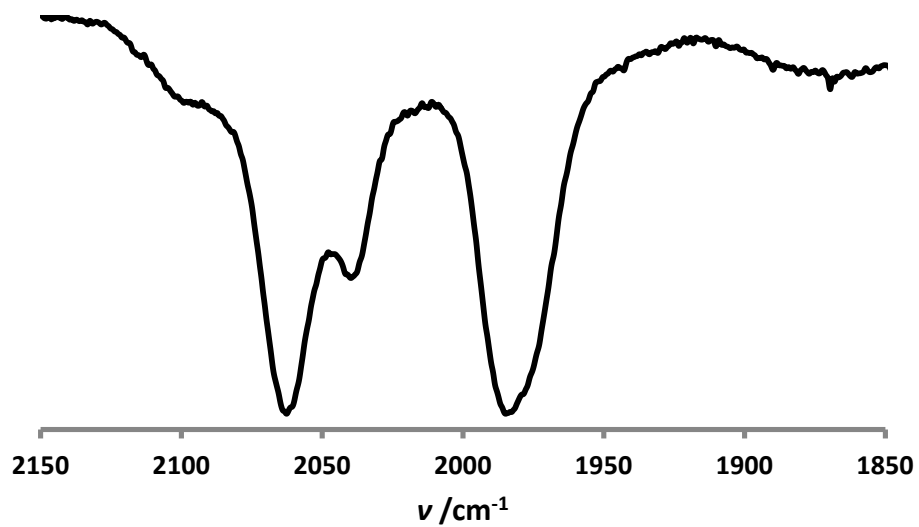

**Figure 23:** FT-IR spectrum ( $\nu_{\text{CO}}$  region,  $\text{CH}_2\text{Cl}_2$ ) of  $[\mathbf{1aF}]\text{BF}_4$ .

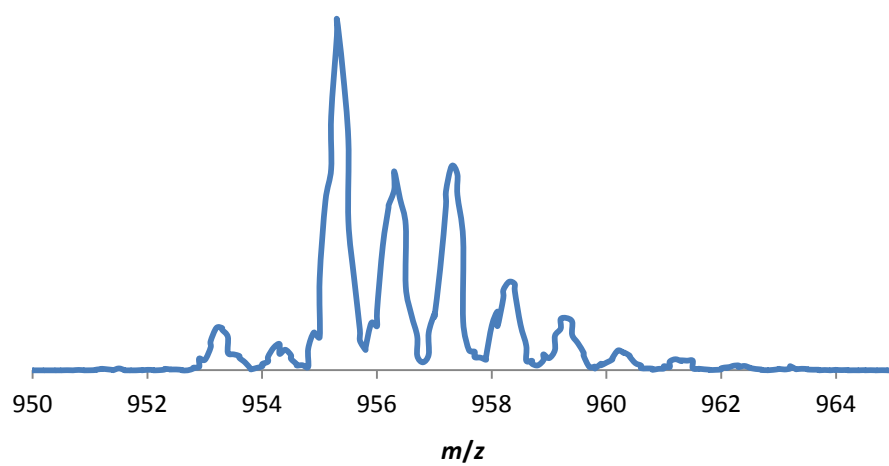

**Figure 24:** Positive ion ESI mass spectrum of  $[\mathbf{1aF}]\text{BF}_4$ .

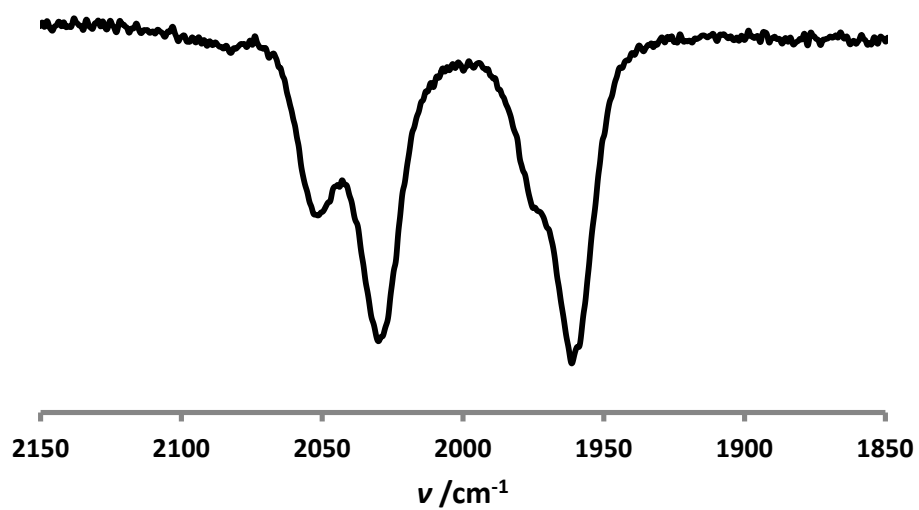

**Figure 25:** FT-IR spectrum ( $\nu_{\text{CO}}$  region,  $\text{CH}_2\text{Cl}_2$ ) of **[1bF]BF<sub>4</sub>**.

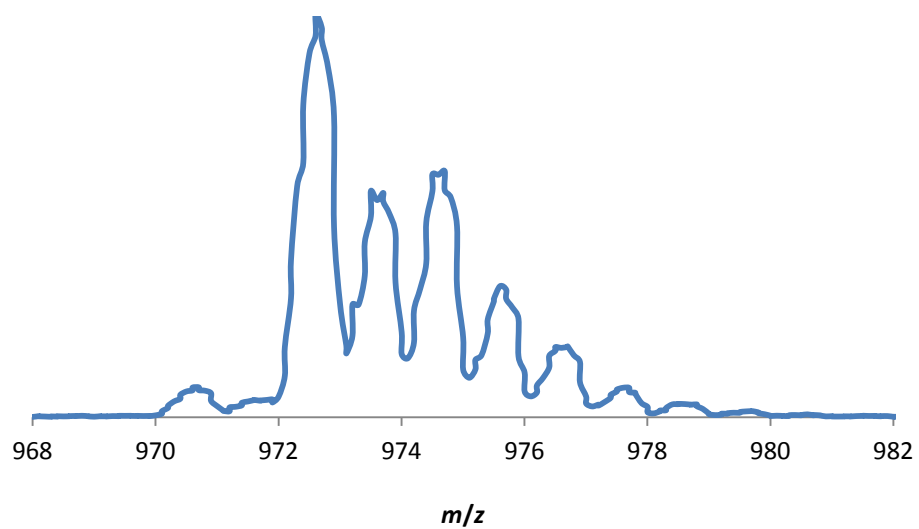

**Figure 26:** Positive ion ESI mass spectrum of **[1bF]BF<sub>4</sub>**.

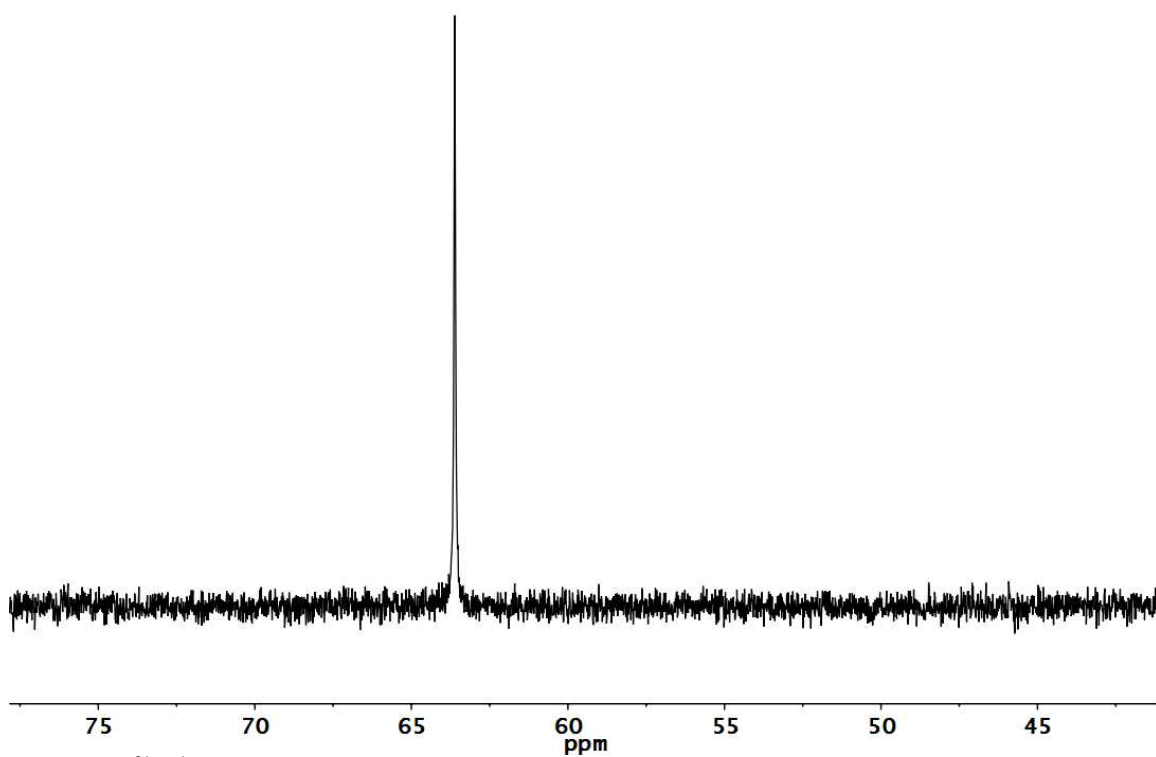

**Figure 27:**  $^{31}\text{P}\{^1\text{H}\}$  NMR spectrum ( $\text{CD}_2\text{Cl}_2$ , 202 MHz) of  $[\mathbf{2I}]\text{BF}_4$ .

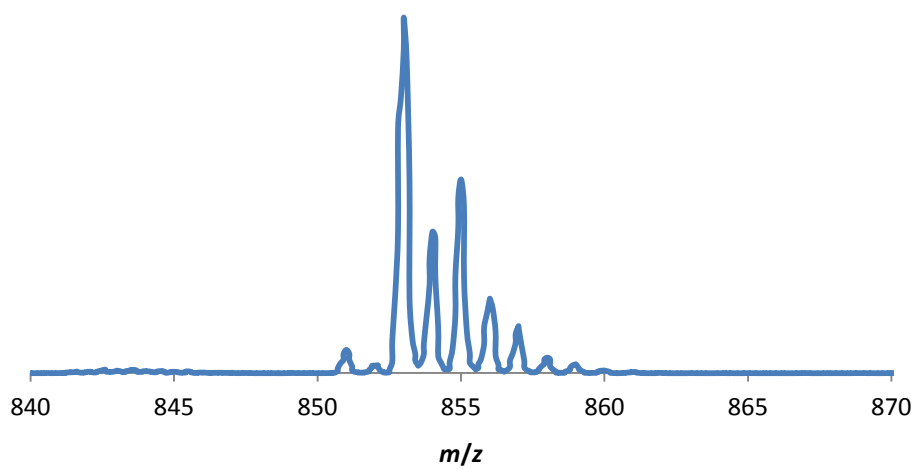

**Figure 28:** Positive ion ESI mass spectrum of  $[\mathbf{2I}]\text{BF}_4$ .

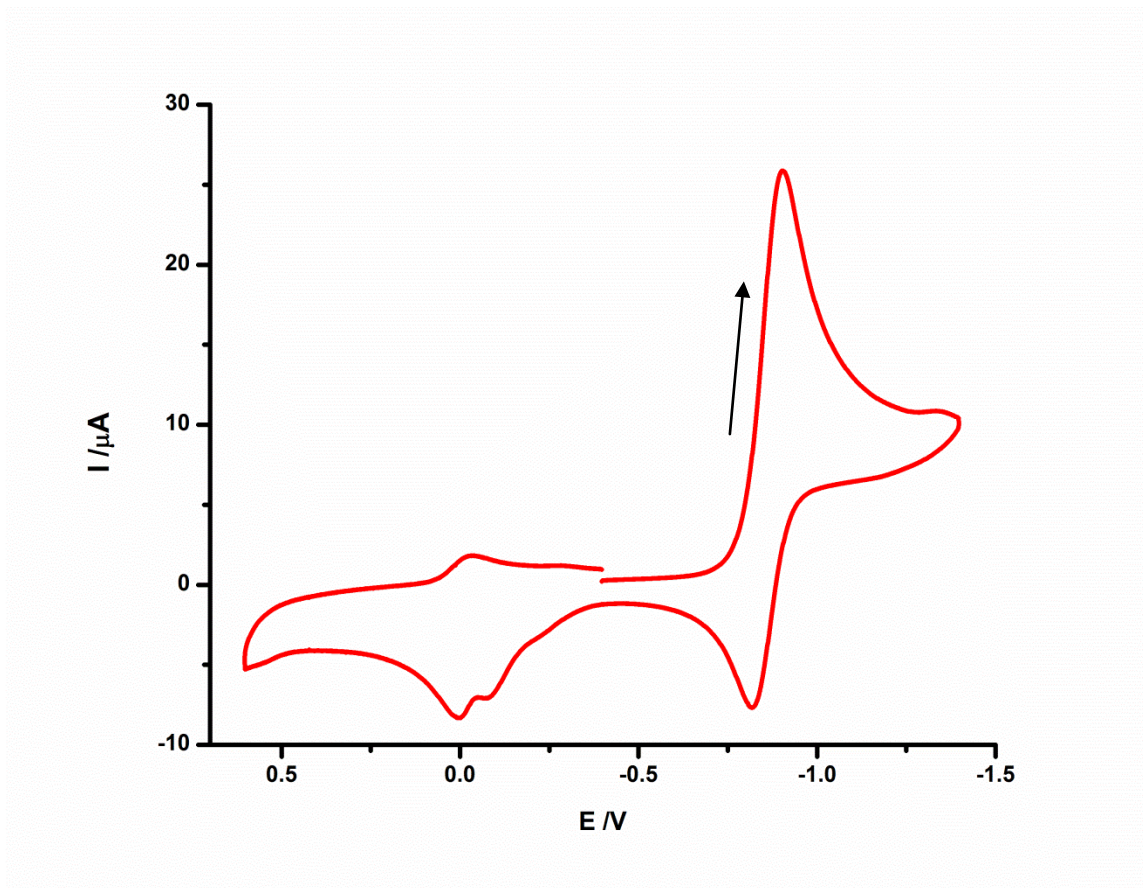

**Figure 29:** Cyclic voltammogram of [2I]BF<sub>4</sub>.
